# Supplementary material for: The feasibility of using a pyrite standard to calibrate the sulfur isotope ratio of marcasite during SIMS analysis
Source: Royal Society of Chemistry journal article supplement (doi:10.1039/d3ja00009e), 2023-01-01
Supplement: d3ja00009e1.xlsx [file d3ja00009e1.xlsx]

## Sheet: HTS4-3
Sample #			Ipr (nA)	32S/Coeff	1se(%)	34S/Coeff	1se(%)	34S/32S	1se(%)	δ34Sraw	δ34S	2 SE
				L'2		H'2		H'2/L'2		‰	‰	‰
LRC2201_warmup@001			1.98537	2933366000	0.0495019	131512600	0.051004	0.0448333	0.00182854
LRC2201_warmup@002			1.98209	2925998000	0.0263364	131181400	0.0273917	0.044833	0.00174353	0.177675	0.688347	0.0289652
LRC2201_warmup@003			1.98537	2917708000	0.0853065	130770200	0.0884506	0.0448195	0.00327238		0.285274
LRC2201_UWPy-1@001			1.98052	2927350000	0.0446767	133185400	0.0463465	0.0454969	0.00189547	30.2134
LRC2201_HTS4-3@001			1.97763	2924005000	0.0441965	131075300	0.0452818	0.0448273	0.00159557	15.0515	1.01127	0.0319115
LRC2201_HTS4-3@002			1.97669	2917879000	0.0273681	130810800	0.0279972	0.0448308	0.00115081	15.13	1.08984	0.0230163
LRC2201_HTS4-3@003			1.97904	2912060000	0.0437223	130557700	0.0451726	0.0448334	0.00172917	15.1905	1.1503	0.0345834
LRC2201_HTS4-3@004			1.97841	2820957000	0.142642	126260100	0.148755	0.0447578	0.00622519	13.4782	-0.562007	0.124504	outlier, rejected
LRC2201_HTS4-3@005			1.97943	2933073000	0.0142652	131463100	0.0143365	0.0448209	0.00100814	14.9074	0.867257	0.0201629
LRC2201_UWPy-1@002			1.98561	2935998000	0.0340662	133566100	0.0351832	0.0454926	0.00147463	30.1158
LRC2201_HTS4-3@006			1.97904	2935121000	0.0381285	131554800	0.0395841	0.0448209	0.00189258	14.907	0.866804	0.0378517
LRC2201_HTS4-3@007			1.97379	2923241000	0.0245617	131013600	0.0256711	0.0448179	0.00198403	14.8395	0.799326	0.0396806
LRC2201_HTS4-3@008			1.97379	2934075000	0.0250199	131495400	0.0261014	0.0448166	0.00169319	14.8103	0.770116	0.0338638
LRC2201_HTS4-3@009			1.97512	2936088000	0.0320988	131597100	0.0325487	0.0448206	0.00105707	14.8986	0.858426	0.0211414
LRC2201_HTS4-3@010			1.97544	2936776000	0.0295107	131622400	0.0310014	0.0448187	0.0017263	14.8558	0.815629	0.0345259
LRC2201_UWPy-1@003			1.97599	2911225000	0.0139205	132437100	0.0142198	0.0454919	0.00122987	30.0995
LRC2201_HTS4-3@011			1.97708	2940034000	0.032718	131762900	0.0339476	0.0448168	0.00164887	14.8135	0.773286	0.0329775
LRC2201_HTS4-3@012			1.97411	2939718000	0.0172471	131765200	0.0180354	0.0448224	0.00125451	14.94	0.899864	0.0250901
LRC2201_HTS4-3@013			1.97888	2955333000	0.0309554	132458500	0.0319553	0.0448202	0.00130013	14.89	0.849821	0.0260026
LRC2201_HTS4-3@014			1.97583	2953315000	0.0269973	132201400	0.0279794	0.0447637	0.00170593	13.6122	-0.427957	0.0341186	outlier, rejected
LRC2201_HTS4-3@015			1.97028	2942650000	0.0414049	131924700	0.0421635	0.0448319	0.0011784	15.1561	1.11588	0.0235679
LRC2201_UWPy-1@004			1.96957	2912999000	0.0298062	132527800	0.0309718	0.0454953	0.00163394	30.1778
LRC2201_HTS4-3@016			1.97223	2943299000	0.0714697	131893000	0.0891481	0.0448112	0.00186232	14.6864	0.646255	0.0372464
LRC2201_HTS4-3@017			1.9727	2954081000	0.0207296	132393600	0.0215164	0.0448172	0.00113229	14.8225	0.782343	0.0226457
LRC2201_HTS4-3@018			1.97106	2949755000	0.0298033	132194900	0.0309555	0.0448156	0.0014049	14.7854	0.745208	0.0280981
LRC2201_HTS4-3@019			1.97724	2958440000	0.0291285	132584300	0.0299612	0.0448156	0.00129263	14.7867	0.746566	0.0258527
LRC2201_HTS4-3@020			1.97951	2955712000	0.0223099	132470400	0.0232928	0.0448185	0.00137952	14.8511	0.810874	0.0275904
LRC2201_UWPy-1@005			1.97591	2925075000	0.0241436	133059200	0.0248663	0.0454891	0.00159109	30.0381
LRC2201_HTS4-3@021			1.97379	2942221000	0.0380492	131851700	0.0477874	0.0448136	0.00144272	14.7421	0.701959	0.0288544
LRC2201_HTS4-3@022			1.97395	2827178000	0.0693584	126689700	0.0712621	0.0448114	0.0022158	14.6907	0.650558	0.044316
LRC2201_HTS4-3@023			1.96754	2936830000	0.0461654	131621100	0.0471282	0.0448174	0.00136276	14.8273	0.787099	0.0272552
LRC2201_HTS4-3@024			1.96699	2922732000	0.0416426	130986900	0.0426764	0.0448166	0.00141824	14.8092	0.768984	0.0283649
LRC2201_HTS4-3@025			1.96628	2921666000	0.0208379	130932100	0.0216774	0.0448142	0.00137763	14.7544	0.714186	0.0275527
LRC2201_UWPy-1@006			1.96284	2905215000	0.0254957	132158500	0.0266952	0.0454901	0.00158954	30.0589
LRC2201_HTS4-3@026			1.963	2921645000	0.0341705	130938600	0.0351875	0.0448167	0.00147503	14.8119	0.771701	0.0295007
LRC2201_HTS4-3@027			1.96034	2911623000	0.0281787	130504700	0.0287869	0.044822	0.0011204	14.9305	0.890353	0.0224081
LRC2201_HTS4-3@028			1.9587	2906064000	0.0363159	130223900	0.0375007	0.0448111	0.00150295	14.6844	0.644217	0.0300589
LRC2201_HTS4-3@029			1.95776	2907572000	0.0345391	130310700	0.0352346	0.0448177	0.00110739	14.8341	0.793892	0.0221477
LRC2201_HTS4-3@030			1.96363	2902878000	0.0254922	130078200	0.0269863	0.0448101	0.00178374	14.6618	0.621574	0.0356748
LRC2201_UWPy-1@007			1.96378	2901222000	0.0549501	131967100	0.0735022	0.0454866	0.0193264	29.9813
LRC2201_HTS4-3@031			1.96323	2908835000	0.0436106	130375100	0.0445481	0.0448204	0.0014092	14.8943	0.854124	0.0281841
LRC2201_HTS4-3@032			1.95971	2902527000	0.0366025	130080100	0.0367718	0.0448162	0.00115398	14.7992	0.75902	0.0230796
LRC2201_HTS4-3@033			1.96159	2898557000	0.0226842	129871900	0.0231569	0.0448057	0.00114459	14.5628	0.522621	0.0228918
LRC2201_HTS4-3@034			1.954	2887455000	0.0371004	129384300	0.0375108	0.0448091	0.0014335	14.6396	0.599383	0.0286701
LRC2201_HTS4-3@035			1.95103	2877013000	0.0319487	128918600	0.033414	0.0448099	0.00198385	14.6568	0.616592	0.0396771
LRC2201_UWPy-1@008			1.95549	2893870000	0.0148659	131639000	0.0152553	0.0454889	0.00100779	30.0329
LRC2201_HTS4-3@036			1.95009	2870876000	0.0257222	128638000	0.0262394	0.0448079	0.00118	14.6128	0.572664	0.0235999
LRC2201_HTS4-3@037			1.94892	2871145000	0.0337643	128670200	0.0347841	0.0448149	0.00155507	14.7716	0.731395	0.0311014
LRC2201_HTS4-3@038			1.94829	2865763000	0.0294741	128429400	0.0301153	0.0448151	0.00163218	14.7747	0.734565	0.0326435
LRC2201_HTS4-3@039			1.94954	2857478000	0.0275875	128029100	0.0286552	0.0448049	0.00161607	14.5449	0.504733	0.0323214
LRC2201_HTS4-3@040			1.94579	2865022000	0.030495	128387500	0.0309883	0.044812	0.00105296	14.7061	0.665955	0.0210593
LRC2201_UWPy-1@009			1.94868	2890171000	0.0308054	131462700	0.0312815	0.0454861	0.00100847	29.9695
LRC2201_HTS4-3@041			1.95087	2869705000	0.0127045	128585100	0.013224	0.0448078	0.00138691	14.6092	0.569041	0.0277383
LRC2201_HTS4-3@042			1.95205	2881605000	0.0284676	129108900	0.0294627	0.0448045	0.00149379	14.5352	0.494996	0.0298758
LRC2201_HTS4-3@043			1.95048	2882992000	0.0209493	129197600	0.022229	0.0448137	0.00185194	14.7444	0.704223	0.0370389
LRC2201_HTS4-3@044			1.95056	2882179000	0.0239937	129182900	0.0240136	0.0448213	0.001017	14.9147	0.874503	0.0203399
LRC2201_HTS4-3@045			1.95502	2891924000	0.0239128	129581000	0.0239612	0.0448079	0.00109367	14.6122	0.571984	0.0218734
LRC2201_UWPy-1@010			1.95338	2899591000	0.0296164	131899700	0.0297772	0.0454891	0.00122616	30.0368
LRC2201_HTS4-3@046			1.9587	2899376000	0.0149064	129932100	0.0151829	0.0448138	0.00151761	14.746	0.705808	0.0303523
LRC2201_HTS4-3@047			1.95486	2900576000	0.0359699	130000000	0.0366782	0.0448187	0.00121877	14.8565	0.816309	0.0243754
LRC2201_HTS4-3@048			1.95001	2893332000	0.0357372	129650300	0.0366163	0.04481	0.00165796	14.6602	0.619989	0.0331593
LRC2201_HTS4-3@049			1.95017	2899776000	0.0412	129937500	0.0427944	0.0448095	0.00192355	14.6482	0.607988	0.0384711
LRC2201_HTS4-3@050			1.95025	2900199000	0.0130177	129969200	0.0137971	0.0448139	0.00134494	14.7473	0.707167	0.0268988
LRC2201_UWPy-1@011			1.94493	2891149000	0.0426162	131535900	0.0436402	0.0454961	0.00145761	30.1944
LRC2201_HTS4-3@051			1.94743	2888083000	0.0289888	129401900	0.0303325	0.0448054	0.00178687	14.5567	0.516507	0.0357374
LRC2201_HTS4-3@052			1.94892	2899434000	0.0233836	129925900	0.024048	0.0448108	0.00116591	14.6778	0.637651	0.0233183
LRC2201_HTS4-3@053			1.9454	2899755000	0.0224142	129934000	0.0229888	0.0448086	0.00121565	14.6282	0.588061	0.0243131
LRC2201_HTS4-3@054			1.94469	2902639000	0.0309797	130083700	0.0321833	0.0448157	0.00144852	14.7881	0.747925	0.0289704
LRC2201_HTS4-3@055			1.94868	2908702000	0.0294377	130330700	0.0301383	0.0448072	0.0010367	14.5956	0.555454	0.0207341
LRC2201_UWPy-1@012			1.9472	2887198000	0.0300293	131358600	0.030406	0.0454969	0.00122019	30.2141
LRC2201_HTS4-3@056			1.94258	2899453000	0.0285203	129936800	0.0295075	0.0448142	0.00146164	14.7555	0.715318	0.0292329
LRC2201_HTS4-3@057			1.94109	2900220000	0.0332376	129952700	0.0336536	0.0448079	0.00121679	14.6117	0.571531	0.0243358
LRC2201_HTS4-3@058			1.93757	2933636000	0.0246426	131472200	0.02521	0.0448154	0.00101923	14.7824	0.742264	0.0203846
LRC2201_HTS4-3@059			1.94164	2909058000	0.031049	130352900	0.0317036	0.0448093	0.00110642	14.6443	0.604138	0.0221283
LRC2201_HTS4-3@060			1.94422	2912964000	0.0241229	130546100	0.0250949	0.0448156	0.0014179	14.7856	0.745434	0.028358
LRC2201_UWPy-1@013			1.94133	2880656000	0.0257575	131041700	0.0265088	0.0454902	0.00122697	30.0623
LRC2201_HTS4-3@061			1.93922	2909154000	0.0393437	130348100	0.0407672	0.0448062	0.00187321	14.5732	0.533037	0.0374643
LRC2201_HTS4-3@062			1.94149	2912374000	0.027649	130530900	0.0285565	0.0448194	0.00153796	14.873	0.832839	0.0307591
LRC2201_HTS4-3@063			1.94016	2916539000	0.0382704	130707200	0.0386628	0.0448158	0.00130417	14.7922	0.752001	0.0260834
LRC2201_HTS4-3@064			1.93757	2913280000	0.0382547	130539900	0.0388062	0.0448086	0.00158291	14.6273	0.587156	0.0316583
LRC2201_HTS4-3@065			1.9382	2916744000	0.034747	130701200	0.0364259	0.0448106	0.00200178	14.6742	0.634028	0.0400355
LRC2201_UWPy-1@014			1.9389	2872181000	0.0257152	130668600	0.0269886	0.0454945	0.00170056	30.1602
LRC2201_HTS4-3@066			1.94203	2921085000	0.0224294	130903200	0.0226249	0.0448132	0.00136091	14.7329	0.692675	0.0272182
LRC2201_HTS4-3@067			1.93836	2925623000	0.0374924	131096100	0.0382696	0.0448096	0.00120205	14.6513	0.611158	0.024041
LRC2201_HTS4-3@068			1.93554	2917508000	0.0322701	130730900	0.0334158	0.0448091	0.00145094	14.6391	0.59893	0.0290188
LRC2201_HTS4-3@069			1.94594	2926144000	0.019357	131121600	0.0197136	0.0448104	0.00101782	14.6683	0.62814	0.0203563
LRC2201_HTS4-3@070			1.94156	2919496000	0.0339485	130816300	0.0344656	0.0448079	0.00131761	14.611	0.570852	0.0263522
LRC2201_UWPy-1@015			1.93624	2874442000	0.0348258	130738000	0.0351011	0.0454829	0.00101125	29.8964
LRC2201_HTS4-3@071			1.93554	2907939000	0.0278724	130303200	0.0281589	0.0448095	0.00114071	14.6479	0.607761	0.0228143
LRC2201_HTS4-3@072			1.93155	2900106000	0.0222766	129947500	0.0233611	0.0448078	0.0015345	14.6106	0.570399	0.0306901
LRC2201_HTS4-3@073			1.93022	2895591000	0.0348273	129743600	0.0355786	0.0448073	0.00150645	14.5984	0.558172	0.0301291
LRC2201_HTS4-3@074			1.926	2896848000	0.0386372	129818500	0.0402277	0.0448137	0.00188747	14.7437	0.703544	0.0377494
LRC2201_HTS4-3@075			1.92576	2888367000	0.0299307	129426400	0.0301853	0.0448095	0.00163692	14.6488	0.608667	0.0327384
LRC2201_UWPy-1@016			1.92576	2853242000	0.0217762	129811600	0.0226688	0.0454962	0.00158677	30.1971
LRC2201_HTS4-3@076			1.92537	2872043000	0.0334634	128713900	0.0342623	0.0448161	0.00128015	14.7987	0.758568	0.0256031
LRC2201_HTS4-3@077			1.92255	2880254000	0.0221536	129069700	0.0226887	0.0448119	0.0010271	14.7027	0.662559	0.020542
LRC2201_HTS4-3@078			1.92513	2878602000	0.0231098	128984300	0.0237143	0.044808	0.0013019	14.6137	0.573569	0.026038
LRC2201_HTS4-3@079			1.92537	2880284000	0.0301935	129061200	0.0307846	0.0448085	0.00112697	14.6255	0.585344	0.0225394
LRC2201_HTS4-3@080			1.92513	2876464000	0.0264851	128896300	0.0270821	0.0448107	0.00112697	14.6751	0.634934	0.0225394
LRC2201_UWPy-1@017			1.92639	2853541000	0.0270335	129803600	0.0279856	0.0454886	0.00163646	30.0259
LRC2201_HTS4-3@081			1.92271	2864468000	0.0285803	128358700	0.0285037	0.0448107	0.00102025	14.6744	0.634254	0.020405
LRC2201_HTS4-3@082			1.92396	2869836000	0.0227662	128580100	0.0234211	0.044804	0.00128334	14.5234	0.483221	0.0256669
LRC2201_HTS4-3@083			1.92036	2873209000	0.035708	128753600	0.0366539	0.0448118	0.00130199	14.6998	0.659615	0.0260398
LRC2201_HTS4-3@084			1.92177	2861233000	0.031738	128207800	0.0324814	0.0448086	0.00135382	14.6276	0.587382	0.0270763
LRC2201_HTS4-3@085			1.92021	2849296000	0.0161275	127666200	0.0168147	0.0448062	0.00135122	14.5741	0.533943	0.0270245
LRC2201_UWPy-1@018			1.91825	2850845000	0.0340268	129681700	0.0345141	0.0454889	0.00118965	30.0318
LRC2201_HTS4-3@086			1.91371	2831679000	0.0541067	126860000	0.0563724	0.0448003	0.00256734	14.4396	0.39944	0.0513468
LRC2201_HTS4-3@087			1.91637	2847143000	0.0268974	127582700	0.0279649	0.0448108	0.00146489	14.6776	0.637424	0.0292979
LRC2201_HTS4-3@088			1.91622	2842612000	0.0138625	127374700	0.014752	0.044809	0.00176554	14.6375	0.597345	0.0353109
LRC2201_HTS4-3@089			1.91199	1851345000	0.0691385	82819620	0.0720325	0.0447348	0.00303317	12.9571	-1.08304	0.0606635	outlier, rejected
LRC2201_HTS4-3@090			1.91622	2836715000	0.0277941	127119300	0.0289737	0.0448121	0.00165255	14.7079	0.667767	0.0330509
LRC2201_UWPy-1@019			1.91348	2843823000	0.0190957	129357200	0.019864	0.0454871	0.00153576	29.991
LRC2201_HTS4-3@091			1.90886	2814880000	0.0179394	126151500	0.0177035	0.0448159	0.00160898	14.7942	0.754039	0.0321796
LRC2201_HTS4-3@092			1.91137	2834285000	0.0206273	127013100	0.0214505	0.0448131	0.00134772	14.7304	0.690184	0.0269543
LRC2201_HTS4-3@093			1.91004	2833381000	0.0310365	126959000	0.0323015	0.0448083	0.0017645	14.621	0.580815	0.03529
LRC2201_HTS4-3@094			1.91012	2825045000	0.0276472	126609800	0.0286923	0.0448169	0.00143799	14.8164	0.77623	0.0287598
LRC2201_HTS4-3@095			1.91027	2821300000	0.0221636	126414700	0.0220496	0.0448073	0.00138289	14.5979	0.557719	0.0276579
LRC2201_UWPy-1@020			1.90644	2833695000	0.0211419	128913100	0.0215933	0.0454929	0.00101839	30.1237
LRC2201_HTS4-3@096			1.90409	2810704000	0.0252962	125940200	0.0264365	0.0448074	0.0017137	14.5997	0.55953	0.034274
LRC2201_HTS4-3@097			1.8994	2800830000	0.0272621	125498800	0.0281439	0.0448077	0.00171087	14.6081	0.567908	0.0342174
LRC2201_HTS4-3@098			1.90245	2804243000	0.02163	125668000	0.0223638	0.0448135	0.00121853	14.739	0.698788	0.0243707
LRC2201_HTS4-3@099			1.90487	2802144000	0.139228	125518600	0.138491	0.0447938	0.00126937	14.2924	0.252257	0.0253874
LRC2201_HTS4-3@100			1.90112	2796395000	0.0260261	125332000	0.0273915	0.0448191	0.00194949	14.8667	0.826498	0.0389898
LRC2201_UWPy-1@021			1.90034	2828036000	0.0400594	128648100	0.0403292	0.0454903	0.00101943	30.063

## Sheet: NJUMc-1
Sample #			Ipr (nA)	32S/Coeff	1se(%)	34S/Coeff	1se(%)	34S/32S	1se(%)	δ34Sraw	δ34S	2 SE
				L'2		H'2		H'2/L'2		‰	‰	‰
S060_warmup@001			1.99382	2771288000	0.0173719	120849900	0.0181372	0.0436078	0.00233346
S060_warmup@002			1.99421	2717649000	0.0758973	118468700	0.0773406	0.0435923	0.00215524	0.599325	-25.2079	0.783059
S060_warmup@003			1.99453	2780196000	0.121572	121269700	0.121497	0.0436191	0.0011542		8.96252
S060_UWPy-1@001			1.99312	2766690000	0.0152323	125784400	0.0158795	0.0454639	0.00150525	29.4657
S060_Mc@001			1.9921	2770155000	0.0184726	120845400	0.0179261	0.043624	0.00153866	-12.1945	-25.6896	0.0307732
S060_Mc@002			1.99351	2773743000	0.018402	120832100	0.0180118	0.0435629	0.00135943	-13.5802	-27.0754	0.0271885
S060_Mc@003			1.99312	2772456000	0.014588	121549800	0.0149927	0.0438419	0.00145211	-7.26133	-20.7565	0.0290423
S060_Mc@004			1.99484	2767520000	0.00995418	120792600	0.00979647	0.0436465	0.00127047	-11.6861	-25.1813	0.0254093
S060_Mc@005			1.99453	2776036000	0.0152582	121346200	0.0170218	0.043712	0.00250994	-10.2021	-23.6972	0.0501987
S060_Mc@006			1.99875	2779115000	0.0131179	120663500	0.0132675	0.043418	0.00145765	-16.8611	-30.3563	0.0291531
S060_Mc@007			2.00595	2787226000	0.015995	122373300	0.0158624	0.0439051	0.00104443	-5.83138	-19.3266	0.0208886
S060_Mc@008			1.99992	2781317000	0.0194001	120494700	0.0201351	0.0433229	0.00129095	-19.0136	-32.5088	0.0258189
S060_Mc@009			2.00391	2783131000	0.0145897	121259200	0.0155012	0.0435693	0.00164876	-13.4331	-26.9282	0.0329752
S060_Mc@010			2.00344	2791867000	0.0213706	122358600	0.0220404	0.0438268	0.00130958	-7.60302	-21.0982	0.0261916
S060_Mc@011			1.99938	2780950000	0.0179668	120504100	0.0177761	0.043332	0.00124003	-18.8082	-32.3034	0.0248005
S060_Mc@012			2.00344	2780559000	0.0175328	121473800	0.0172938	0.0436868	0.00104818	-10.7731	-24.2683	0.0209635
S060_Mc@013			2.0047	2786115000	0.0177749	121870300	0.018173	0.043742	0.00122598	-9.5232	-23.0184	0.0245195
S060_Mc@014			2.00337	2784742000	0.013374	120922700	0.0136122	0.0434233	0.00105043	-16.7399	-30.2351	0.0210086
S060_Mc@015			2.00321	2783619000	0.0137443	121302000	0.0138721	0.0435771	0.00135347	-13.258	-26.7532	0.0270694
S060_UWPy-1@002			1.99985	2734793000	0.0178941	124258500	0.016243	0.0454362	0.00267202	28.8385
S060_Mc@016			1.99992	2774484000	0.0150136	121616700	0.015566	0.043834	0.00185615	-7.44044	-20.9356	0.037123
S060_Mc@017			1.99562	2770382000	0.0138807	119102900	0.0134784	0.0429915	0.00134981	-26.517	-40.0122	0.0269963	outlier, rejected
S060_Mc@018			1.98584	2762955000	0.0253467	120428900	0.0261182	0.043587	0.00144063	-13.0339	-26.529	0.0288125
S060_Mc@019			1.98342	2754260000	0.0177781	119460600	0.0195776	0.043373	0.00227474	-17.8787	-31.3739	0.0454948
S060_Mc@020			1.98678	2761070000	0.0147916	119712100	0.0154443	0.0433571	0.00181065	-18.238	-31.7332	0.036213
S060_Mc@021			1.98858	2759739000	0.0137341	121071500	0.0148953	0.0438706	0.00251242	-6.61055	-20.1057	0.0502483
S060_Mc@022			1.98631	2760946000	0.0230362	120478700	0.0247105	0.0436367	0.00216916	-11.9073	-25.4025	0.0433832
S060_Mc@023			1.97951	2747055000	0.0264458	119655300	0.0270727	0.0435577	0.00154809	-13.6973	-27.1925	0.0309618
S060_Mc@024			1.97528	2735819000	0.0156854	119549000	0.0162977	0.0436977	0.00138959	-10.5268	-24.0219	0.0277918
S060_Mc@025			1.98052	2747528000	0.0147138	119500500	0.0144355	0.0434938	0.00146069	-15.1433	-28.6385	0.0292139
S060_Mc@026			1.98076	2741224000	0.0112303	120399000	0.0118905	0.0439216	0.00134391	-5.45618	-18.9514	0.0268782
S060_Mc@027			1.97575	2742271000	0.0120324	120368800	0.0134546	0.0438938	0.00244252	-6.08544	-19.5806	0.0488505
S060_Mc@028			1.97849	2747176000	0.0165463	118362000	0.0174967	0.043085	0.00209899	-24.4009	-37.8961	0.0419798	outlier, rejected
S060_Mc@029			1.97841	2747513000	0.129718	120366000	0.129204	0.0438091	0.00105305	-8.00472	-21.4999	0.021061
S060_Mc@030			1.97833	2746491000	0.0142029	118952300	0.0154616	0.0433106	0.00189457	-19.2912	-32.7864	0.0378914
S060_UWPy-1@003			1.97434	2736629000	0.0138247	124426700	0.0136512	0.0454671	0.00258194	29.54
S060_Mc@031			1.9702	2719780000	0.0230333	119317900	0.0236992	0.0438704	0.00155339	-6.61553	-20.1107	0.0310678
S060_Mc@032			1.97207	2741655000	0.0143094	119829600	0.0143832	0.043707	0.00111961	-10.315	-23.8102	0.0223921
S060_Mc@033			1.96621	2729825000	0.0194593	118868600	0.0214391	0.0435444	0.00235977	-13.998	-27.4932	0.0471953
S060_Mc@034			1.96949	2715296000	0.0256788	119205500	0.026706	0.0439015	0.0014368	-5.91245	-19.4076	0.0287359
S060_Mc@035			1.96762	2737386000	0.0153448	119604700	0.0156877	0.043693	0.00164546	-10.6325	-24.1277	0.0329091
S060_Mc@036			1.96386	2729924000	0.0285561	119238700	0.030426	0.0436784	0.00244113	-10.9645	-24.4596	0.0488226
S060_Mc@037			1.96449	2731404000	0.0199676	119927800	0.020232	0.043907	0.00109672	-5.78745	-19.2826	0.0219344
S060_Mc@038			1.96496	2732447000	0.0138592	119201100	0.0131532	0.0436243	0.00161711	-12.1883	-25.6835	0.0323422
S060_Mc@039			1.96863	2734789000	0.0116484	119174000	0.0115141	0.043577	0.00299191	-13.2587	-26.7539	0.0598382
S060_Mc@040			1.97012	2740876000	0.0210989	119430200	0.0228007	0.0435737	0.00206147	-13.3339	-26.8291	0.0412294
S060_Mc@041			1.97051	2733397000	0.0202382	118338900	0.0205712	0.0432937	0.0012053	-19.675	-33.1702	0.0241061
S060_Mc@042			1.97035	2732323000	0.0185261	119007900	0.018591	0.0435556	0.00125365	-13.7451	-27.2403	0.025073
S060_Mc@043			1.96746	2734204000	0.0132438	119231500	0.0137227	0.0436074	0.00125396	-12.5719	-26.0671	0.0250792
S060_Mc@044			1.97121	2736082000	0.00516638	119230400	0.00526158	0.0435771	0.0014173	-13.2585	-26.7537	0.028346
S060_Mc@045			1.97379	2747719000	0.0194865	119758700	0.0205057	0.0435848	0.00190645	-13.0839	-26.5791	0.038129
S060_UWPy-1@004			1.96949	2735915000	0.0294392	124419300	0.0297703	0.0454763	0.00119638	29.7471
S060_Mc@046			1.96644	2735868000	0.0153803	120100100	0.0160559	0.0438984	0.00144556	-5.9831	-19.4783	0.0289113
S060_Mc@047			1.96597	2731522000	0.0123085	118288500	0.0124949	0.043305	0.00112877	-19.4194	-32.9145	0.0225754
S060_Mc@048			1.96988	2744788000	0.0217247	118678200	0.0231941	0.0432377	0.00220689	-20.9437	-34.4389	0.0441377
S060_Mc@049			1.97192	2744378000	0.00942864	118739200	0.00967833	0.0432664	0.00119797	-20.2941	-33.7893	0.0239593
S060_Mc@050			1.9666	2737476000	0.00961008	119428200	0.00998714	0.0436271	0.0018735	-12.1245	-25.6197	0.0374699
S060_Mc@051			1.96449	2731782000	0.0156458	118819600	0.0155411	0.0434953	0.00125412	-15.1101	-28.6052	0.0250823
S060_Mc@052			1.96488	2735554000	0.0174194	119292500	0.0177085	0.0436082	0.00111996	-12.5543	-26.0494	0.0223993
S060_Mc@053			1.96449	2738845000	0.0165538	119486200	0.0177446	0.0436265	0.00174466	-12.1392	-25.6344	0.0348932
S060_Mc@054			1.9684	2721625000	0.0378745	119232000	0.0392691	0.0438091	0.00188267	-8.00426	-21.4994	0.0376534
S060_Mc@055			1.96323	2736767000	0.0169138	119216200	0.0169943	0.043561	0.00112515	-13.6228	-27.118	0.022503
S060_Mc@056			1.96808	2734426000	0.00850762	120164400	0.00786166	0.043945	0.00127166	-4.92677	-18.422	0.0254331
S060_Mc@057			1.96449	2739280000	0.014144	119455600	0.0149281	0.0436084	0.00210984	-12.5488	-26.044	0.0421968
S060_Mc@058			1.96621	2739758000	0.0145761	120486200	0.0147119	0.0439769	0.0015253	-4.20376	-17.6989	0.0305059
S060_Mc@059			1.96488	2743393000	0.0109661	120712700	0.0107771	0.0440012	0.00175728	-3.65397	-17.1492	0.0351456
S060_Mc@060			1.9637	2740813000	0.0139424	120255800	0.0153127	0.0438759	0.00195597	-6.49077	-19.9859	0.0391194
S060_UWPy-1@005			1.96175	2724434000	0.0147765	123896400	0.0162934	0.045476	0.00193802	29.741
S060_Mc@061			1.96253	2739387000	0.126742	119699800	0.125571	0.0436959	0.00184886	-10.5687	-24.0638	0.0369772
S060_Mc@062			1.96151	2736375000	0.0213743	119289500	0.0217463	0.043594	0.00105768	-12.8749	-26.3701	0.0211535
S060_Mc@063			1.95557	2689262000	0.0385823	118204200	0.0422623	0.0439541	0.0045747	-4.71981	-18.215	0.091494
S060_Mc@064			1.95306	2724758000	0.0146974	118779900	0.015556	0.0435928	0.00142399	-12.9016	-26.3968	0.0284797
S060_Mc@065			1.95392	2710768000	0.0100552	118265900	0.00943145	0.0436282	0.00127911	-12.1005	-25.5957	0.0255823
S060_Mc@066			1.95447	2723880000	0.0152324	117923000	0.0156149	0.0432923	0.00201876	-19.7072	-33.2023	0.0403752
S060_Mc@067			1.95463	2720086000	0.00861932	119509600	0.00950519	0.043936	0.00148735	-5.13192	-18.6271	0.0297469
S060_Mc@068			1.954	2719533000	0.0104408	119477400	0.00977802	0.0439331	0.00183183	-5.19736	-18.6925	0.0366365
S060_Mc@069			1.9551	2726732000	0.0176664	119127400	0.0183756	0.0436887	0.00152367	-10.7303	-24.2255	0.0304734
S060_Mc@070			1.95205	2721904000	0.124974	118490200	0.124027	0.0435321	0.00166493	-14.2765	-27.7717	0.0332985
S060_Mc@071			1.94954	2714695000	0.0161212	118951800	0.0168262	0.0438177	0.00255973	-7.80862	-21.3038	0.0511947
S060_Mc@072			1.94994	2682295000	0.0406482	116100400	0.043595	0.043284	0.0034188	-19.8953	-33.3905	0.0683759
S060_Mc@073			1.95119	2717108000	0.0125116	117648600	0.0122539	0.0432992	0.00196743	-19.55	-33.0452	0.0393486
S060_Mc@074			1.95345	2718186000	0.0183381	118397100	0.0177887	0.0435574	0.00198739	-13.7039	-27.1991	0.0397479
S060_UWPy-1@006			1.9508	2704155000	0.0176506	122979700	0.0184138	0.045478	0.00118156	29.7868
S060_Mc@075			1.95056	2709928000	0.0165162	119030700	0.0162115	0.0439239	0.00121829	-5.4041	-18.8993	0.0243657
S060_Mc@076			1.94555	2713866000	0.0192716	117639300	0.0202485	0.0433475	0.00189033	-18.4565	-31.9517	0.0378067
S060_Mc@077			1.94814	2711294000	0.0167749	117385100	0.017735	0.0432949	0.00170372	-19.6483	-33.1435	0.0340743
S060_Mc@078			1.94861	2708252000	0.0150911	118933100	0.0148399	0.0439151	0.0011809	-5.60427	-19.0994	0.023618
S060_Mc@079			1.949	2711071000	0.013707	118537000	0.0144729	0.0437233	0.00195514	-9.94663	-23.4418	0.0391028
S060_Mc@080			1.94665	2706499000	0.0200106	117821200	0.021126	0.0435327	0.00180979	-14.2627	-27.7579	0.0361959
S060_Mc@081			1.94657	2704635000	0.00977109	118654100	0.00978472	0.0438707	0.0012249	-6.6101	-20.1053	0.0244979
S060_Mc@082			1.94751	2688334000	0.0112641	117256200	0.0124089	0.0436167	0.00185971	-12.3611	-25.8563	0.0371943
S060_Mc@083			1.94485	2700917000	0.121066	117978900	0.12029	0.043681	0.00269131	-10.9038	-24.399	0.0538262
S060_Mc@084			1.94814	2707149000	0.0171743	117716500	0.0167764	0.0434836	0.00128279	-15.3759	-28.8711	0.0256559
S060_Mc@085			1.94415	2690615000	0.0188498	116021400	0.0204421	0.0431208	0.00184184	-23.5903	-37.0855	0.0368367	outlier, rejected
S060_Mc@086			1.94133	2701677000	0.0177812	117449600	0.0178144	0.0434728	0.00134756	-15.6184	-29.1136	0.0269512
S060_Mc@087			1.94329	2696895000	0.00903895	117434500	0.00959572	0.0435444	0.00124623	-13.9992	-27.4943	0.0249246
S060_Mc@088			1.94297	2702242000	0.019962	118412900	0.0208478	0.0438202	0.00136958	-7.75224	-21.2474	0.0273915
S060_Mc@089			1.93898	2698145000	0.0236756	117402800	0.0238807	0.0435124	0.00167993	-14.7224	-28.2176	0.0335987
S060_Mc@090			1.93875	2693841000	0.00821196	118078900	0.00857531	0.0438329	0.00144311	-7.46512	-20.9603	0.0288622
S060_UWPy-1@007			1.94141	2676381000	0.00767608	121649500	0.00898791	0.045453	0.00220586	29.2191
S060_Mc@091			1.93554	2688299000	0.00878861	118126600	0.0100086	0.043941	0.0021545	-5.01689	-18.5121	0.04309
S060_Mc@092			1.93836	2691514000	0.0181421	117947300	0.0183943	0.0438219	0.00125881	-7.71465	-21.2098	0.0251761
S060_Mc@093			1.93366	2697503000	0.0185604	117595200	0.0178472	0.0435941	0.00135611	-12.8724	-26.3676	0.0271221
S060_Mc@094			1.93272	2693251000	0.0168353	117659700	0.017658	0.0436868	0.00147727	-10.7724	-24.2676	0.0295453
S060_Mc@095			1.93382	2692915000	0.0891036	117142800	0.0882056	0.0435004	0.00173489	-14.9948	-28.49	0.0346978
S060_Mc@096			1.93632	2693353000	0.0159137	117321000	0.0178379	0.0435594	0.00269834	-13.6572	-27.1524	0.0539669
S060_Mc@097			1.93437	2695659000	0.0177448	117220100	0.0192239	0.0434848	0.00176537	-15.3483	-28.8434	0.0353074
S060_Mc@098			1.93335	2692697000	0.00955197	117565000	0.00956214	0.0436607	0.00161131	-11.365	-24.8602	0.0322262
S060_Mc@099			1.93804	2692968000	0.0154955	117538700	0.0154324	0.0436465	0.00106554	-11.6859	-25.1811	0.0213109
S060_Mc@100			1.93679	2691081000	0.00902572	117123700	0.00850625	0.0435229	0.00204515	-14.4846	-27.9798	0.040903
S060_Mc@101			1.9285	2690125000	0.0199879	117305000	0.0211533	0.0436058	0.00165376	-12.6084	-26.1036	0.0330752
S060_Mc@102			1.92748	2689187000	0.0143714	117256800	0.014741	0.0436031	0.00112472	-12.6693	-26.1645	0.0224945
S060_Mc@103			1.92537	2686188000	0.012253	117962800	0.0126428	0.0439146	0.00190386	-5.61604	-19.1112	0.0380771
S060_Mc@104			1.93225	2687420000	0.0687192	115867100	0.0687961	0.0431146	0.00162405	-23.7293	-37.2245	0.0324809	outlier, rejected
S060_Mc@105			1.93546	2692435000	0.0174601	117143800	0.0179207	0.0435085	0.00142598	-14.8112	-28.3063	0.0285196
S060_UWPy-1@008			1.93703	2683231000	0.0122348	122011300	0.012219	0.0454718	0.00147211	29.6448
S060_Mc@106			1.93656	2693261000	0.0101867	117314000	0.0110569	0.0435584	0.00215553	-13.6821	-27.1773	0.0431106
S060_Mc@107			1.93437	2699558000	0.0222597	118620800	0.0228062	0.0439408	0.00119572	-5.02165	-18.5168	0.0239143
S060_Mc@108			1.93202	2693590000	0.0157294	116515000	0.0168137	0.0432564	0.00152755	-20.5196	-34.0148	0.0305509
S060_Mc@109			1.92662	2683011000	0.0130026	117800000	0.0127491	0.0439059	0.00110164	-5.81236	-19.3075	0.0220329
S060_Mc@110			1.93178	2685948000	0.0254222	117033600	0.0276882	0.0435726	0.0026514	-13.3604	-26.8556	0.0530281
S060_Mc@111			1.93132	2691006000	0.00922713	117028800	0.00905033	0.0434888	0.00106778	-15.2561	-28.7513	0.0213556
S060_Mc@112			1.93139	2694447000	0.00999896	117675500	0.0114797	0.0436733	0.00176718	-11.0781	-24.5733	0.0353436
S060_Mc@113			1.93038	2695119000	0.0241639	117705800	0.0242657	0.0436737	0.00127989	-11.0704	-24.5656	0.0255977
S060_Mc@114			1.93358	2689393000	0.015638	116640500	0.0154288	0.0433706	0.00213165	-17.9344	-31.4296	0.0426329
S060_Mc@115			1.93421	2697210000	0.0130836	118443500	0.0133299	0.0439133	0.00125045	-5.64367	-19.1388	0.025009
S060_Mc@116			1.92498	2686721000	0.0191187	118085000	0.0208254	0.0439513	0.00207562	-4.78344	-18.2786	0.0415123
S060_Mc@117			1.92694	2691170000	0.0214327	117618500	0.0215185	0.0437053	0.00116943	-10.3535	-23.8487	0.0233886
S060_Mc@118			1.92584	2687744000	0.00799867	117920500	0.00822839	0.0438734	0.00134427	-6.54783	-20.043	0.0268854
S060_Mc@119			1.9231	2684480000	0.010656	117038800	0.0109248	0.0435983	0.00183658	-12.7775	-26.2727	0.0367317
S060_Mc@120			1.92443	2688530000	0.0144798	117122400	0.0145027	0.0435637	0.00106739	-13.5608	-27.056	0.0213479
S060_UWPy-1@009			1.92639	2672465000	0.0140936	121517700	0.0136699	0.0454703	0.00121399	29.6108
S060_Mc@121			1.92795	2683079000	0.00776103	117833300	0.0070811	0.0439172	0.00204047	-5.55694	-19.0521	0.0408094
S060_Mc@122			1.92787	2686353000	0.0153818	117211000	0.0158595	0.043632	0.00133382	-12.0144	-25.5096	0.0266764
S060_Mc@123			1.92748	2665502000	0.0128848	116476100	0.0123095	0.0436976	0.00121962	-10.5286	-24.0238	0.0243924
S060_Mc@124			1.92427	2674707000	0.0129727	116474300	0.0134093	0.0435466	0.00177575	-13.9489	-27.4441	0.035515
S060_Mc@125			1.9213	2677800000	0.0139778	116950300	0.0136835	0.043674	0.00148112	-11.063	-24.5581	0.0296224
S060_Mc@126			1.92639	2679326000	0.0164921	117872000	0.0165343	0.0439932	0.00109512	-3.83648	-17.3317	0.0219024
S060_Mc@127			1.9213	2677187000	0.0154286	116420400	0.0148928	0.0434861	0.00107056	-15.3181	-28.8133	0.0214113
S060_Mc@128			1.92162	2678220000	0.0108048	117012900	0.0109386	0.0436905	0.00132828	-10.6891	-24.1843	0.0265656
S060_Mc@129			1.92068	2669427000	0.0091512	115660200	0.00873058	0.0433277	0.00146219	-18.9044	-32.3996	0.0292439
S060_Mc@130			1.92396	2674201000	0.00839306	117473600	0.00970863	0.0439285	0.00194816	-5.30084	-18.796	0.0389632
S060_Mc@131			1.92302	2678583000	0.0150977	116498900	0.0155325	0.0434927	0.00107021	-15.1676	-28.6627	0.0214041
S060_Mc@132			1.91614	2670114000	0.0171354	116384500	0.0172669	0.0435878	0.00217047	-13.0146	-26.5098	0.0434094
S060_Mc@133			1.92193	2652951000	0.0144012	116546500	0.0147928	0.0439309	0.00107021	-5.24673	-18.7419	0.0214043
S060_Mc@134			1.92091	2653036000	0.0258975	115324000	0.0281234	0.0434687	0.00269864	-15.7126	-29.2078	0.0539727
S060_Mc@135			1.92279	2669860000	0.0132704	116457200	0.0127208	0.0436192	0.00242333	-12.3036	-25.7988	0.0484666
S060_UWPy-1@010			1.9249	2676740000	0.0180301	121729500	0.0177387	0.0454768	0.00127573	29.758

## Sheet: Yorkfit
							Sample ID	δ34SSIMS	2SE	δ34SGS-IRMS	2SE
							HTS4-3	0.688347	0.0289652	0.769722	0.213308
							NJUMc-1	-25.2079	0.783059	-25.6253	0.240106
								1.01926	Slope
								0.0041
								0.00796
								0.068118	Intercept
								0.00291
								0.0057
								-0.95874	Rho(slope-inter)
								0	MSWD
								1	Prob. of fit
								for 2-sigma percent input errors
